# Supplementary material
Source: publisher figshare collection journal article supplement (https://acs.figshare.com/ndownloader/files/7543456)
Supplement: Supplementary file 1 [file 7543456]

# **The Complex Amorphous Phase in Poly(butylene succinate-*ran*-butylene azelate) Isodimorphic Copolyesters**

*Idoia Arandia<sup>1</sup>, Agurtzane Mugica<sup>1</sup>, Manuela Zubitur<sup>2</sup>, Rosica Mincheva<sup>3</sup>, Philippe Dubois<sup>3,4</sup>, Alejandro J. Müller\*<sup>1,5</sup> and Angel Alegría\*<sup>6</sup>*

<sup>1</sup>POLYMAT and Polymer Science and Technology Department, Faculty of Chemistry, University of the Basque Country UPV/EHU, Paseo Manuel de Lardizabal 3, 20018 Donostia-San Sebastián, Spain

<sup>2</sup>Chemical and Environmental Engineering Department, Polytechnic School, University of the Basque Country UPV/EHU, 2008 Donostia-San Sebastián, Spain

<sup>3</sup>Laboratory of Polymeric and Composite Materials, Center of Innovation and Research in Materials and Polymers (CIRMAP), University of Mons (UMONS), Place du Parc 20, 7000, Mons, Belgium

<sup>4</sup>Materials Research and Technology Department (MRT), Luxembourg Institute of Science and Technology (LIST), Rue du Brill, 41, 4422 Belvaux, Luxembourg

<sup>5</sup>IKERBASQUE, Basque Foundation for Science, Bilbao, Spain

<sup>6</sup>Departamento de Física de Materiales, University of the Basque Country UPV/EHU and Centro de Física de Materiales (CFM) (CSIC-UPV/EHU) - Materials Physics Center (MPC), Paseo Manuel de Lardizabal 5, 20018 San Sebastián, Spain

\*Corresponding authors

## Supporting Information

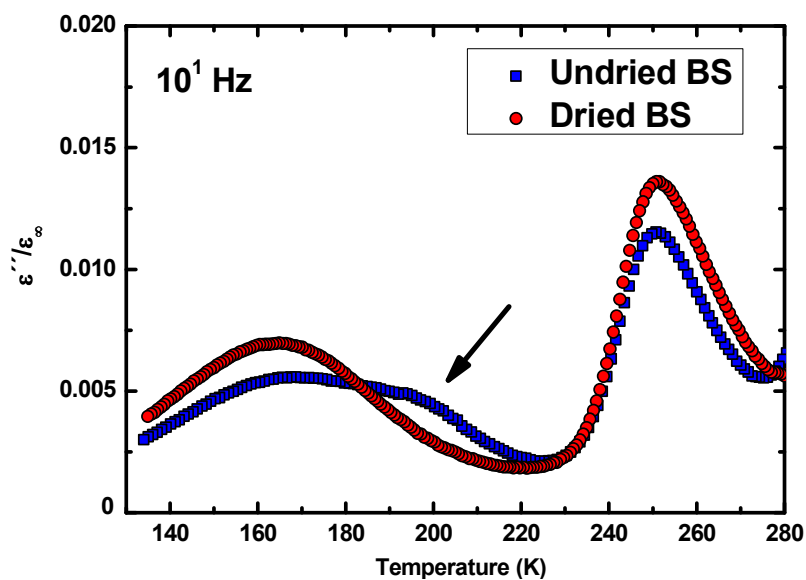

**Figure S1.** Isochronal plots of  $\varepsilon''/\varepsilon_\infty$  for undried and dried BS homopolymer at  $10^1$  Hz.

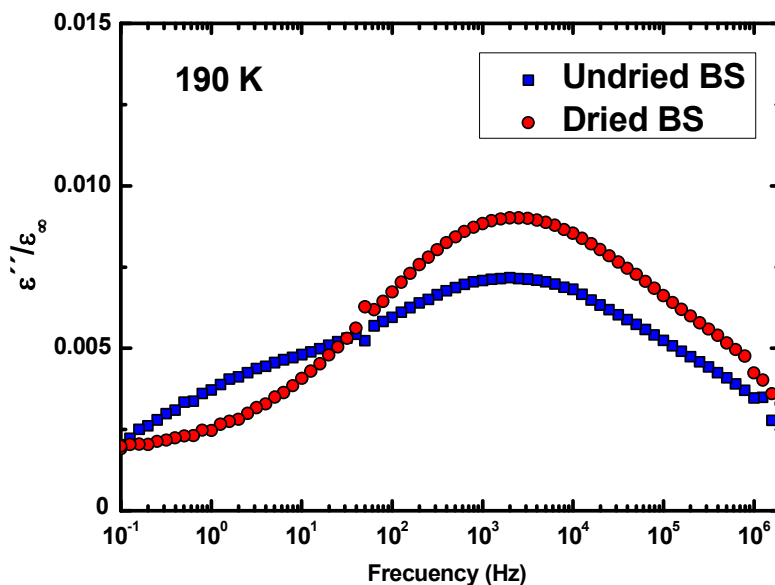

**Figure S2.** Dielectric loss spectra versus frequency of undried and dried BS homopolymer at 190 K.

Figure S1 and S2 present, respectively, isochronal and isothermal plots of permittivity losses on undried and high vacuum dried BS samples. In order to obtain the undried BS data, the measurements were carried out on a previously dried sample stored for

weeks in a desiccator and without having been subjected to any further drying protocol. After that measurement, the same sample was dried under high vacuum ( $10^{-5}$  Torr) overnight and the measurements were repeated. Both samples show a clear dielectric relaxation at low temperature, which is attributed to local dipole reorientation occurring in the glassy state. The dried sample presents a single peak, in agreement with what has been observed in similar homopolymers in literature<sup>1</sup> and in BAZ in this work. Moreover, the  $\beta$  relaxation measured in dried BS is similar to that determined in amorphous BS by Charlon et al.<sup>2</sup> which is in line with the general finding that crystallization of polymers does not affect the secondary relaxation except in an amplitude factor.<sup>3-6</sup> However Charlon et al.<sup>2</sup> observed a double peak structure in the  $\beta$  relaxation of crystallized BS which looks very much the same determined by us in the undried BS. The above results clearly evidence that new relaxation mode at low-frequencies/high-temperature is not an intrinsic characteristic of PBS but would be most likely related to the uptake of water molecules. This finding is against the interpretation given by Charlon et al. in ref (2) where they concluded that the presence of this new relaxation peak is due to the same molecular arrangements of the  $\beta$  relaxation in fully amorphous BS but taking place in a more constrained amorphous environment. Already commented, this interpretation is against the general finding that crystallization of polymers does not affect the secondary relaxation except in an amplitude factor.<sup>3-5</sup>

## References

- (1) Soccio, M.; Nogales, A.; Lotti, N.; Munari, A.; Ezquerra, T. A. The  $\beta$  relaxation as a probe to follow real-time polymer crystallization in model aliphatic polyesters. *Polymer* **2007**, *48*, 4742-4750.
- (2) Charlon, S.; Delbreilh, L.; Dargent, E.; Follain, N.; Soulestin, J.; Marais, S. Influence of crystallinity on the dielectric relaxations of poly(butylene succinate) and poly[(butylene succinate)-co-(butylene adipate)]. *Eur. Polym. J.* **2016**, *84*, 366-376.
- (3) Alegría, A.; Colmenero, J. Dielectric relaxation of polymers: segmental dynamics under structural constraints. *Soft Matter* **2016**, *12*, 7709-7725.
- (4) Coburn, J. C.; Boyd, R. H. Dielectric relaxation in poly(ethylene terephthalate). *Macromolecules* **1986**, *19*, 2238-2245.
- (5) Nogales, A.; Ezquerra, T. A.; García, J. M.; Baltá-Calleja, F. J. Structure–dynamics relationships of the  $\alpha$ -relaxation in flexible copolyesters during crystallization as revealed by real-time methods. *J. Polym. Sci., Part B: Polym. Phys.* **1999**, *37*, 37-49.
- (6) Soccio, M.; Nogales, A.; Lotti, N.; Munari, A.; Ezquerra, T. A. Evidence of Early Stage Precursors of Polymer Crystals by Dielectric Spectroscopy. *Phys. Rev. Lett.* **2007**, *98*, 037801.
